# Supplementary material
Source: Royal Society of Chemistry journal article supplement (doi:10.1039/d6nr01112h)
Supplement: d6nr01112h1.pdf [file d6nr01112h1.pdf]

## Supporting Information

### Pore Size Engineering in Covalent Organic Frameworks for High-Performance Anion Exchange Membranes

Man Cai<sup>1</sup>, Hengyi Wang<sup>1</sup>, Tianyi Chen<sup>1</sup>, Cheng Lian<sup>\*1</sup>, Fuzhen Xuan<sup>\*2</sup>, Bin Zhang<sup>\*1,2</sup>

<sup>1</sup>Key Laboratory for Advanced Materials, School of Chemistry and Molecular Engineering, East China University of Science and Technology, Shanghai 200237, China

<sup>2</sup>Shanghai Key Laboratory of Intelligent Sensing and Detection, Institute of Intelligent Sensing and Instruments, East China University of Science and Technology, Shanghai 200237, China

## Materials and Methods

### Reagents

(Most chemical reagents were of analytical grade and were purchased from Shanghai Macklin Biochemical Technology Co., Ltd., including triethylamine, acetic acid, N,N-dimethylformamide, ethanol, methanol, acetonitrile, acetone, ethyl acetate, n-hexane, sodium chloride, potassium carbonate, sodium carbonate, sodium bicarbonate, potassium chromate, and 1-methylpiperidine. Silver nitrate was obtained from Sinopharm Chemical Reagent Co., Ltd. 1,2-Dibromoethane were purchased from Shanghai Titan Scientific Co., Ltd. 2,5-Dihydroxyterephthalaldehyde was purchased from Shanghai Kewel Chemical Technology Co., Ltd. 1,3,5-Tris(4-aminophenyl) benzene (TAPB) was purchased from Anhui Zesheng Technology Co., Ltd. 1,3,5-Trimethyl-[4'-amino-(1,1-biphenyl-4-yl)] (TABB) was purchased from Shanghai Dibai Chemical Technology Co., Ltd. 1,3,5-Trimethylenephenyl (TAB) was purchased from Shanghai Yinghan Chemical Technology Co., LTD

### Synthesis of 1-Methylpiperidine-functionalized quaternary ammonium monomer

**Synthesis of 2,5-Bis(2-bromoethoxy) terephthalaldehyde<sup>[1]</sup>:** Under anhydrous and oxygen-free conditions, 2,5-dihydroxy-1,4-benzenedicarboxaldehyde (1.6 g, 10 mmol) and K<sub>2</sub>CO<sub>3</sub> (5.3 g, 39 mmol) were added to a 250 mL round-bottom flask, followed by the addition of acetonitrile (anhydrous, 100 mL) and 1,2-dibromoethane (5.1 mL, 58 mmol). The mixture was heated under reflux and stirred overnight. The reaction gradually changed from reddish-brown to a bright yellow. Upon completion, the mixture was cooled to room temperature, concentrated under reduced pressure, dissolved in dichloromethane, and washed with an aqueous Na<sub>2</sub>CO<sub>3</sub> solution. The resulting organic phase was dried over anhydrous MgSO<sub>4</sub>, filtered, and concentrated. The crude product was purified by silica gel column chromatography using DCM: hexane (2:1) as the eluent. After concentration under reduced pressure, the product was obtained as a bright yellow crystalline solid.

<sup>1</sup>H NMR (400 MHz, Chloroform-d)  $\delta$  10.56 (s, 2H), 7.45 (s, 2H), 4.46 (t, J = 5.8 Hz, 4H), 3.71 (t, J = 5.8 Hz, 4H).

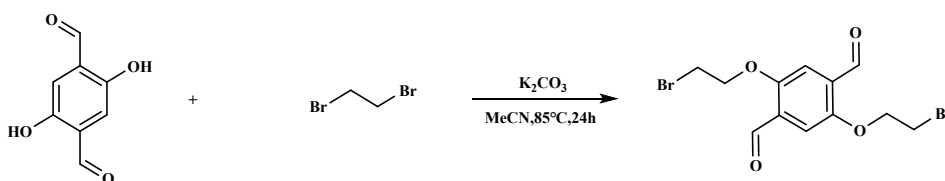

### Synthesis of 2,5-Bis[2-(1-methylpiperidin-1-ium-1-yl)ethoxy]terephthalaldehyde (2p)<sup>[2]</sup>:

0.12 mmol of 1-methylpiperidine (14.5  $\mu$ L) was dissolved in 50 mL of acetonitrile, followed by the addition of 0.06 mmol of 2,5-bis(2-bromoethoxy)terephthalaldehyde (22.9 mg) to the solution. The mixture was refluxed at 83 °C overnight. The crude product was then dissolved in water, extracted with chloroform, and subsequently evaporated under rotary conditions. The resulting hydrated orange monomer was dried overnight in a vacuum oven at 100 °C to completely remove moisture, yielding a dry, bright yellow solid product.

<sup>1</sup>H NMR (400 MHz, DMSO-*d*<sub>6</sub>)  $\delta$  10.44 (s, 2H), 7.58 (s, 2H), 4.64 (t, 4H), 3.97 (t, 4H), 3.50

(t,  $J = 6.9$  Hz, 8H), 3.18 (s,  $J = 4.4$  Hz, 6H), 1.85 (q,  $J = 6.0$  Hz, 8H), 1.57 (q,  $J = 6.9$  Hz, 4H).

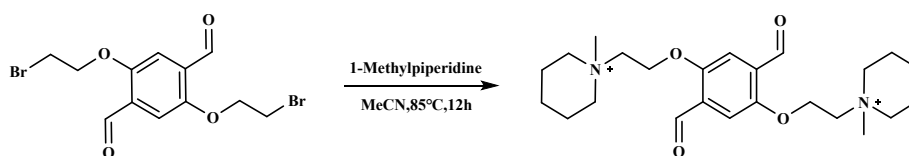

### Preparation of COF-Pips powder

**Synthesis of COF-Pip-S2:** Keep in an oxygen-free environment in the glove box, 1,3,5-Trimethylenephanyl (TAB, 12 mg, 0.10 mmol) and the previously synthesized **2p** (62.7 mg, 0.15 mmol) were added to a 20 mL vial. Then, a pre-mixed solution of 1,4-dioxane/mesitylene (4:1 v/v, 4.0 mL) was added. The mixture was sonicated at room temperature until the monomers were completely dissolved. Scandium trifluoromethanesulfonate (3.0 mg, 6.0  $\mu$ mol) was added to the dissolved mixture, followed by another brief period of sonication. The vial was then sealed with a plastic cap and kept for 10 minutes. Finally, while keeping the resulting powder in a moist state, it was activated by Soxhlet extraction with methanol for 12 hours<sup>[3]</sup>. Subsequently, the powder was dried by heating from 50 to 100 °C at a rate of 1 °C/min under a nitrogen flow until completely dry, yielding a gray purple dry powder<sup>[4]</sup>.

**Synthesis of COF-Pip-2:** 1,3,5-Tris(4-aminophenyl)benzene (TAPB, 36 mg, 0.10 mmol) and the previously synthesized **2p** (62.7 mg, 0.15 mmol) were added to a 20 mL vial. Then, 1,4-dioxane/mesitylene (4:1 v/v, 4.0 mL) was added. The mixture was sonicated at room temperature until the monomers were completely dissolved. Scandium trifluoromethanesulfonate (3.0 mg, 6.0  $\mu$ mol) was added to the dissolved mixture, followed by brief period of sonication. Let it stand for 10 minutes. Finally, it was activated by Soxhlet extraction with methanol for 12 hours<sup>[3]</sup>. Subsequently, the powder was dried by heating from 50 to 100 °C at a rate of 1 °C/min under a nitrogen flow until completely dry, yielding a yellow dry powder<sup>[4]</sup>.

**Synthesis of COF-Pip-B2:** 1,3,5-Trimethyl-[4'-amino-(1,1-biphenyl-4-yl)] (TABB, 58 mg, 0.10 mmol) and the previously synthesized **2p** (62.7 mg, 0.15 mmol) were added to a 20 mL vial. Then, a pre-mixed solution of 1,4-dioxane/mesitylene (4:1 v/v, 4.0 mL) was added. The mixture was sonicated at room temperature. Scandium trifluoromethanesulfonate (3.0 mg, 6.0  $\mu$ mol) was added to the dissolved mixture, followed by brief period of sonication. Let it stand for 10 minutes. Finally, it was activated by Soxhlet extraction with methanol for 12 hours<sup>[3]</sup>. Subsequently, the powder was dried by heating from 50 to 100 °C at a rate of 1 °C/min under a nitrogen flow until completely dry, yielding a faint yellow dry powder<sup>[4]</sup>.

## Preparation of COF-Pip Membranes

### Synthesis of Amorphous COF-Pip-S2, COF-Pip-2, and COF-Pip-B2 membranes<sup>[5]</sup>:

Following the membranes synthesis method described in the literature. The dissolution step of COF-Pip-S2 was carried out in a vacuum glovebox. For COF-Pip-S2 and COF-Pip-2, **2p** (62.7mg, 0.15 mmol) and **TAB** or **TAPB** (12 mg or 36 mg, respectively, each 0.10 mmol) were individually dissolved in 500  $\mu\text{L}$  of a pre-prepared solution of trifluoroacetic acid/water (90:10 v/v) with sonication until complete dissolution. The solutions were then mixed, resulting in the immediate formation of a yellow oligomeric powder, which gradually aggregated. For COF-Pip-B2, **TABB** (57.9 mg, 0.10 mmol) and **2p** (62.7 mg, 0.15 mmol) were dissolved respectively in 1200  $\mu\text{L}$  and 400  $\mu\text{L}$  of the previously prepared trifluoroacetic acid: water (95:5 v) solution. The solutions were then ultrasonicated until the monomers were completely dissolved, and the solutions were mixed. Subsequently, 150  $\mu\text{L}$  of the oligomeric solution was pipetted onto a preheated (40 °C) square silicon wafer substrate (side length 1.5 cm) or glass slide placed on a leveled petri dish. After the polymer deposited from the solution, a complementary petri dish was immediately placed on top as a cover. The assembly was left undisturbed for 4 hours, allowing solvent evaporation and the formation of a dark red amorphous membranes on the silicon surface. The silicon wafer with the membranes was then rapidly submerged in methanol, causing the membranes to detach from the substrate. The detached membrane was soaked in a triethylamine/methanol (1:9 v/v) solution, where the trifluoroacetate ions in the membranes were neutralized by triethylamine, causing the membranes to rapidly change from reddish-brown to bright yellow. The membranes were subjected to Soxhlet extraction with tetrahydrofuran for 12 hours to remove residual oligomers. After extraction, the membranes were washed three times each with tetrahydrofuran and n-pentane. They were then wrapped in filter paper to prevent deformation during drying and dried overnight in a vacuum oven at 50 °C, yielding opaque, orange-yellow membranes with a yield of 95%. Notably, Since the solubility of TABB in the trifluoroacetic acid/water system is poorer compared to TAPB and TAB, more solvents need to be added for dissolution. Less solvent will cause the evaporation rate of the mixed solution on the substrate to be too fast.

### Solvothermal Annealing of COF-Pip-S2, COF-Pip-2, and COF-Pip-B2 membranes<sup>[5]</sup>:

According to the method provided in the literature, the membranes were placed in 5 mL vials with 0.4 mL of acetonitrile and 0.04 mL of 10 mol/L acetic acid as a catalyst. The vials were sealed with caps and placed in an oven at 100 °C for 48 hours for thermal annealing of the amorphous membranes. After cooling, the membranes were washed with acetonitrile and methanol, followed by Soxhlet extraction with tetrahydrofuran to remove oligomers. The solvents were then exchanged three times each with tetrahydrofuran and n-pentane, resulting in opaque membranes.

## Characterization

The  $^1\text{H}$  ( $^1\text{H}$ , 400M) and  $^{13}\text{C}$  NMR spectra ( $^{13}\text{C}$ , 400M) spectra by Bruker AVANCE III (Switzerland), The Fourier Transform Infrared Spectroscopy (FTIR) by Thermo Fisher Scientific Nicolet iS5 (America), X-ray Powder Diffraction (PXRD) by Rigaku SmartLab SE (Japan), Scanning Electron Microscopy (SEM) by ZEISS GeminiSEM 300 (German), Atomic Force Microscopy (AFM) by Bruker Dimension Icon (German), Electrochemical Workstation by CHI600E, Fully Automatic Surface Area and Porosity Analyzer (BET) by Micromeritics ASAP 2460 (American), Thermogravimetric Analysis (TG) by TA Q50 (American).

## Water Uptake and Dimensional Swelling Measurement

For the determination of Water uptake and Dimensional swelling, the dry ion-exchange membrane was weighed and the obtained mass  $m_0$  (mg), area  $A_0$  ( $\text{cm}^2$ ), and thickness  $d_0$  ( $\mu\text{m}$ ) were measured. The weighed and dried membrane was then immersed in deionized water for 12 hours, and the new mass  $m_1$  (mg), area  $A_1$  ( $\text{cm}^2$ ), and thickness  $d_1$  ( $\mu\text{m}$ ) were obtained. According to the formula, the results can be calculated as follows:

$$\text{Water uptake (wt\%)} = (m_1 - m_0) / m_0 \times 100\%$$

$$\text{Area swelling (\%)} = (A_1 - A_0) / A_0 \times 100\%,$$

$$\text{Through-plane swelling (\%)} = (d_1 - d_0) / d_0 \times 100\%$$

## IEC Determination

Before the IEC test, the mass ( $W_0$ , g) of the sample dry anion exchange membrane was weighed. The dried ion exchange membrane was immersed in a 1M sodium chloride solution at  $60^\circ\text{C}$  for 24 hours to ensure that the  $\text{Cl}^-$  ions in the membrane were fully exchanged. Then, it was immersed in a 1M sodium sulfate solution at  $60^\circ\text{C}$  for three days, using potassium chromate as the indicator. The chloride ions displaced in the solution were titrated with a standard silver nitrate solution ( $c$ ,  $\text{mol}\cdot\text{L}^{-1}$ ) until a brick-red precipitate was formed. The volume of the titration ( $V$ , mL) was recorded. The ion exchange capacity was calculated using the formula

$$\text{IEC} = cV / W_0.$$

## $\text{HCO}_3^-$ and $\text{OH}^-$ Conductivity Measurement

Before the test, the dried membranes were respectively immersed in  $80^\circ\text{C}$ , 1.5M  $\text{NaHCO}_3$  and

NaOH solutions for 24 hours. The Br<sup>-</sup> form of the membrane ions were completely exchanged for HCO<sub>3</sub><sup>-</sup> and OH<sup>-</sup>. Using an electrochemical workstation, the anion conductivity of the membrane in the form of HCO<sub>3</sub><sup>-</sup> and OH<sup>-</sup> was measured at 100% humidity by the AC impedance spectroscopy method. The anion conductivity ( $\sigma$ , mS·cm<sup>-1</sup>) was calculated according to the following formula:

$$\sigma = I / AR$$

where  $I$  (cm) and  $A$  (cm<sup>2</sup>) represent the distance between the electrodes on both sides of the membrane and the cross-sectional area of the sample.  $R$  ( $\Omega$ ) represents the membrane resistance obtained from the impedance spectroscopy method.

### **Alkaline stability Measurement**

The prepared membranes were thoroughly immersed in a pre-prepared 1M KOH solution at 60°C. The 1M KOH solution was replaced every 24 hours to maintain a constant pH, and the OH<sup>-</sup> ion conductivity was measured once every 24 hours.

## Morphology characterizations of membranes

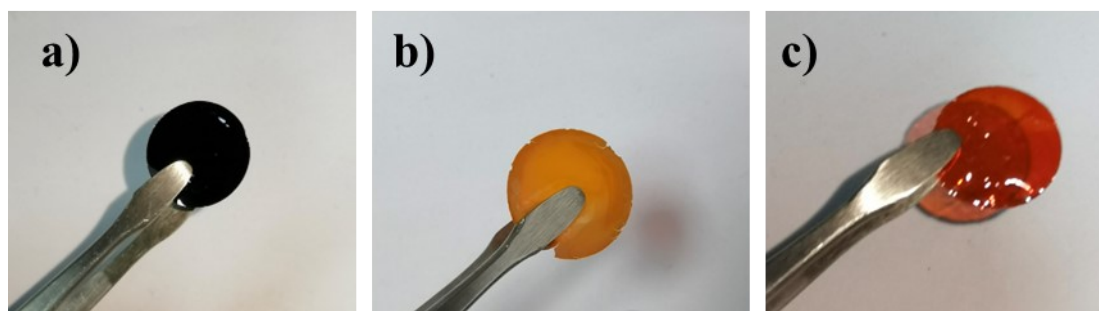

**Figure S1.** Photos of (a) COF-Pip-S2, (b) COF-Pip-2, (c) COF-Pip-B2 membranes.

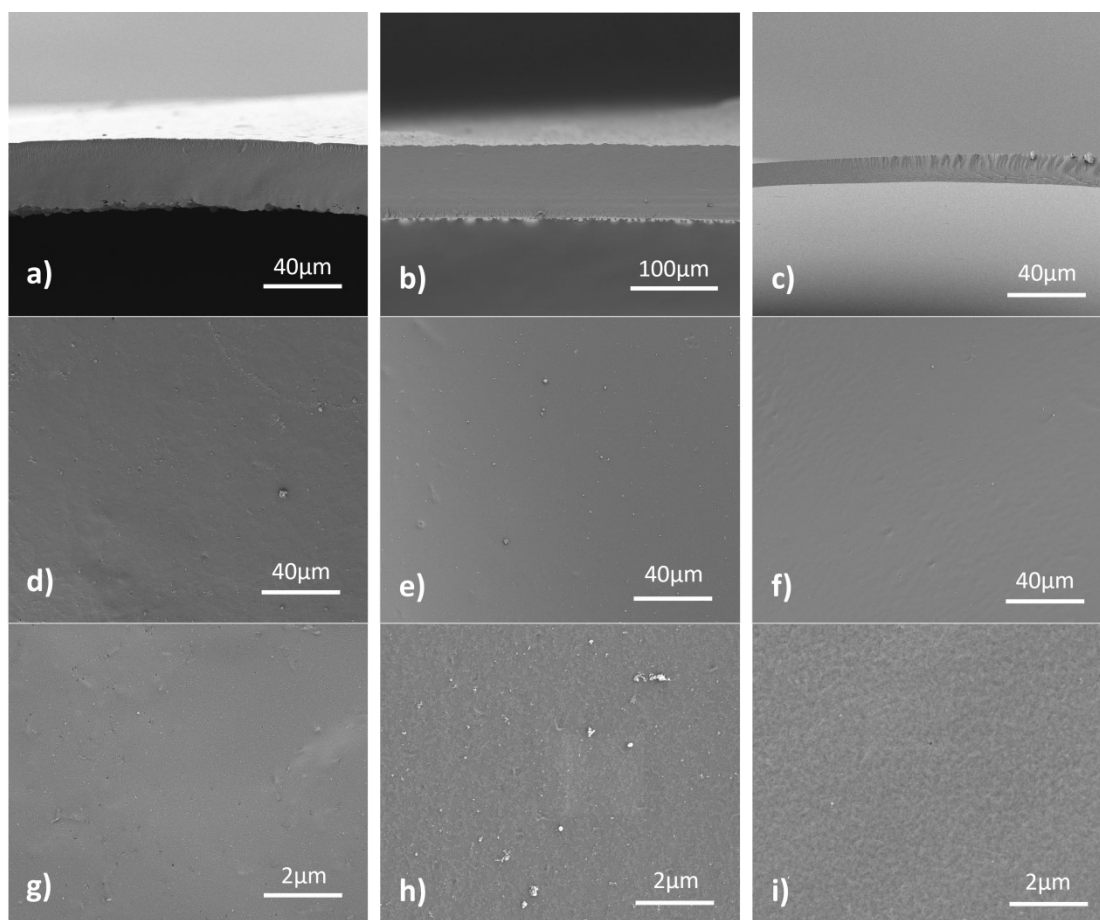

**Figure S2.** Synthesized COF-Pip membranes using the face-on orientation method (a) Cross-sectional SEM image of COF-Pip-S2, (b) COF-Pip-2, and (c) COF-Pip-B2. (d) Top-view images of COF-Pip-S2, (e) COF-Pip-2, and (f) COF-Pip-B2 at low magnification along with (g) top-view images of COF-Pip-S2, (h) COF-Pip-2, and (i) COF-Pip-B2 at high magnification.

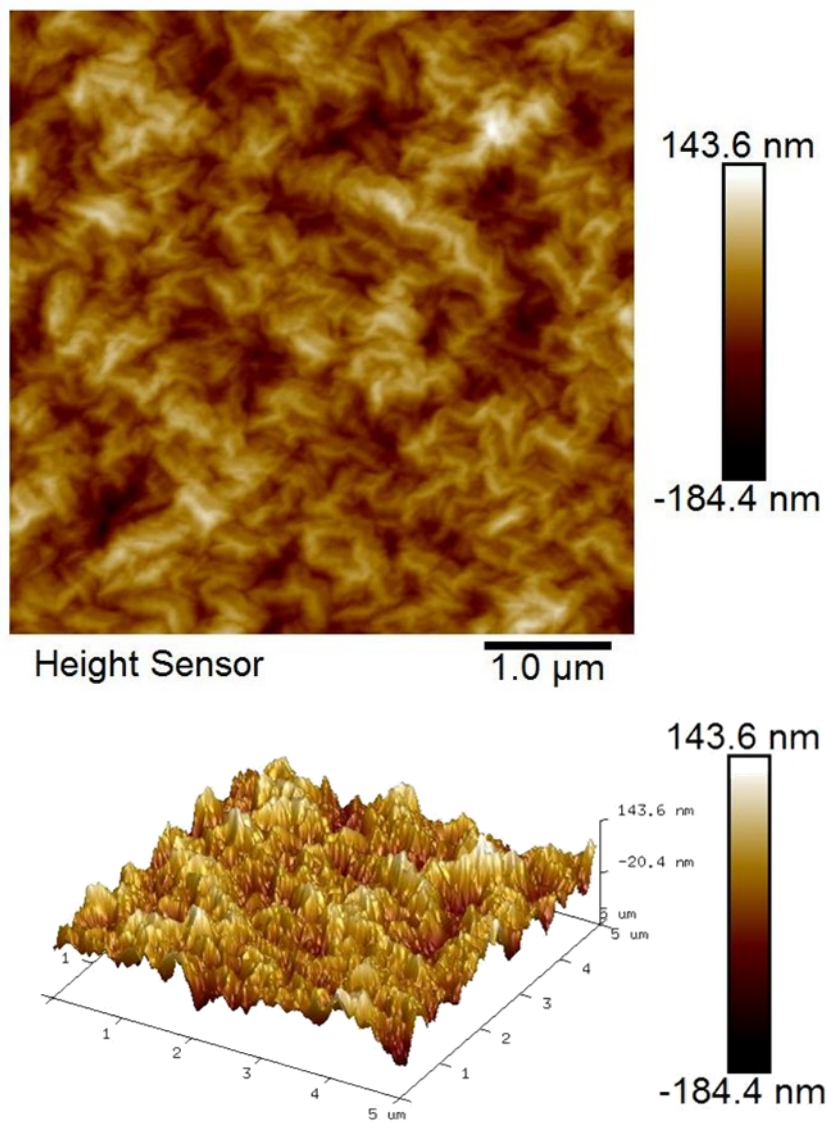

**Figure S3.** (a) Top view AFM images and (b) 3D AFM image of COF-Pip-2.

## Crystalline structures of COF-Pip membranes

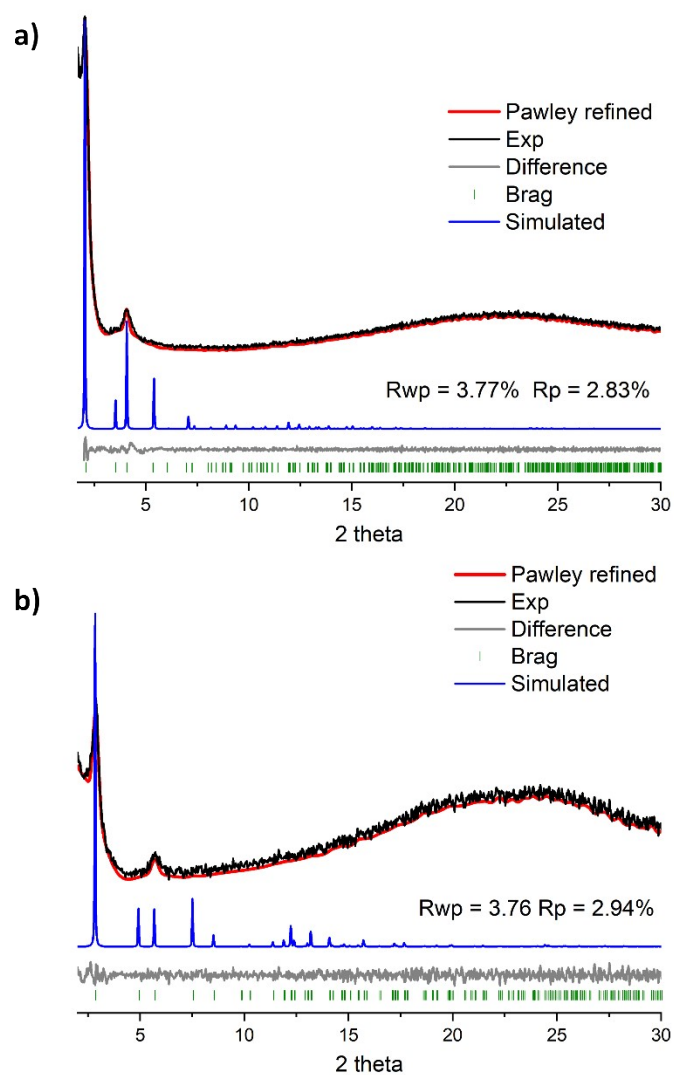

**Figure S4.** (a) PXRD pattern of COF-Pip-B2, including the Pawley refined (red), experimental (black), simulated curves (blue), Bragg positions (green), and difference plot (grey). (b) PXRD pattern of COF-Pip-2, including the Pawley refined (red), experimental (black), simulated curves (blue), Bragg positions (green), and difference plot (grey).

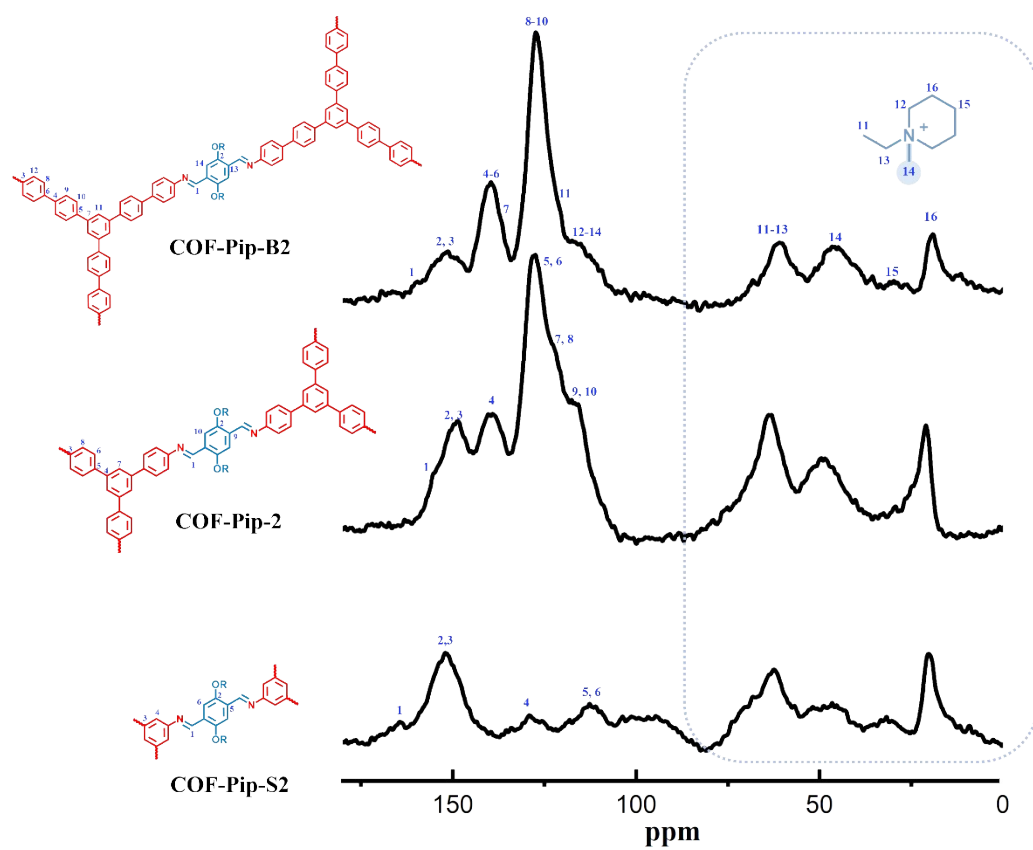

**Figure S5.**  $^{13}\text{C}$  solid-state NMR of COF-Pip membranes.

### Thermal stability of COF-Pip membranes

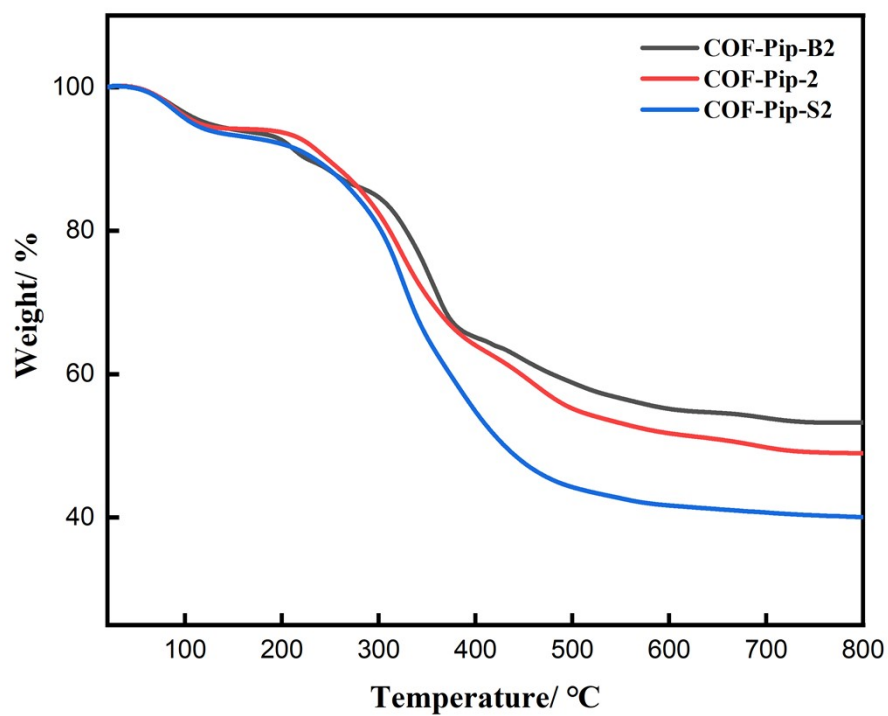

**Figure S6.** TGA curves of the COF-Pip membranes.

## Ion conductivity performance of COF-Pip membranes

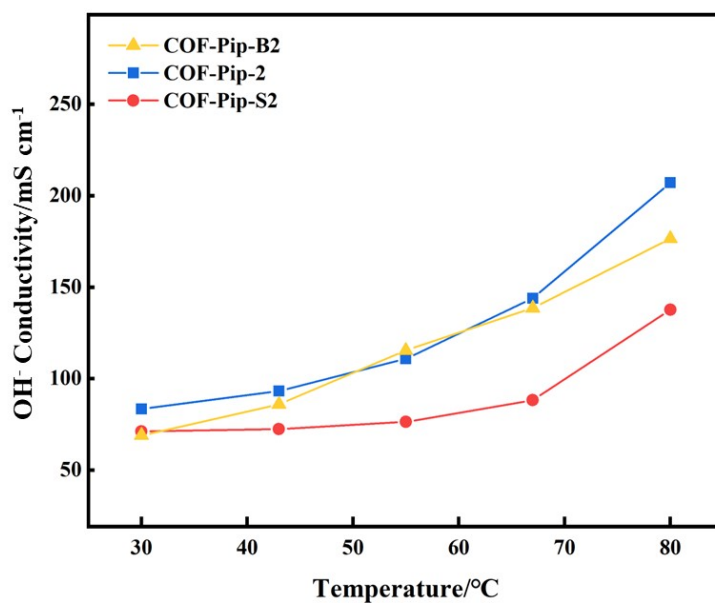

**Figure S7.** The comparison curve of OH<sup>-</sup> Conductivity of the COF-Pips membrane under temperature gradient ranging from 30 to 80 °C (100% RH).

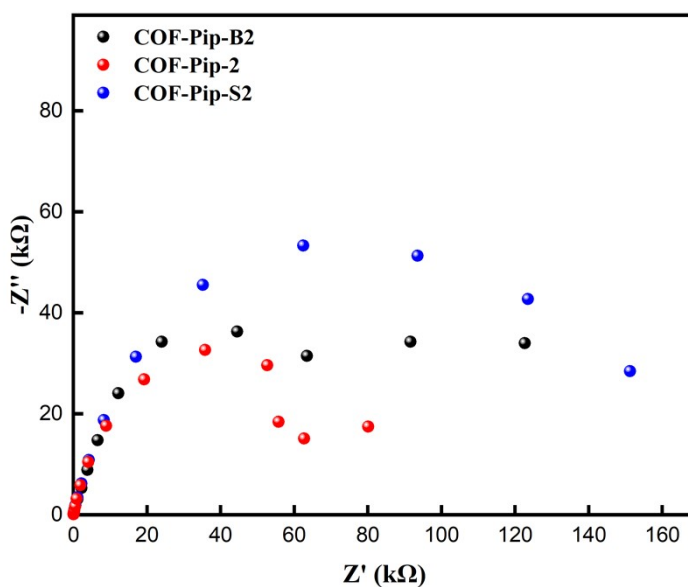

**Figure S8.** EIS curve of COF-Pip membranes after 1.5M NaOH treatment under 80 °C and 100% RH.

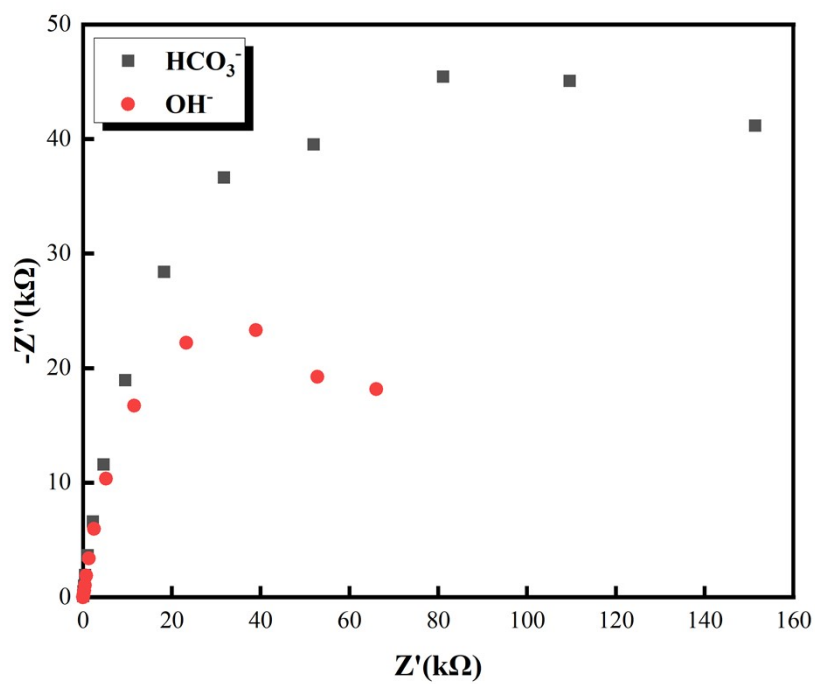

**Figure S9.** EIS curve of COF-Pip-2 membranes after 1.5M NaOH (red) and  $\text{NaHCO}_3$  (black) treatment under 80 °C and 100% RH.

**Table S1.** Fractional atomic coordinates for the unit cell of COF-Pip-B2

| COF-Pip-B2: Space group symmetry P3                                                                  |         |         |         |     |         |         |         |
|------------------------------------------------------------------------------------------------------|---------|---------|---------|-----|---------|---------|---------|
| $a = b = 50.0000 \text{ \AA}, c = 7.5256 \text{ \AA}, \alpha = \beta = 90^\circ, \gamma = 120^\circ$ |         |         |         |     |         |         |         |
| C1                                                                                                   | 0.35243 | 0.65344 | 1.22176 | C56 | 0.38203 | 1.02283 | 1.58168 |
| C2                                                                                                   | 0.63678 | 0.32899 | 0.63128 | C57 | 0.41973 | 1.07342 | 1.69368 |
| C3                                                                                                   | 0.65751 | 0.3857  | 0.66241 | H58 | 0.61364 | 0.32559 | 0.63899 |
| C4                                                                                                   | 0.67396 | 0.40715 | 0.79725 | H59 | 0.39034 | 0.70033 | 1.22161 |
| C5                                                                                                   | 0.66635 | 0.42951 | 0.84502 | H60 | 0.57798 | 0.5704  | 1.41321 |
| C6                                                                                                   | 0.64223 | 0.43095 | 0.75839 | H61 | 0.60824 | 0.59404 | 1.26354 |
| C7                                                                                                   | 0.62695 | 0.41064 | 0.61667 | H62 | 0.45586 | 0.4233  | 1.3576  |
| C8                                                                                                   | 0.63444 | 0.38811 | 0.56965 | H63 | 0.4257  | 0.42942 | 1.43456 |
| N9                                                                                                   | 0.58389 | 0.49627 | 1.02051 | H64 | 0.52279 | 0.94856 | 1.56283 |
| C10                                                                                                  | 0.56213 | 0.48291 | 1.13848 | H65 | 0.54235 | 0.9673  | 1.76473 |
| C11                                                                                                  | 0.54182 | 0.49539 | 1.18228 | H66 | 0.49727 | 0.94206 | 1.93873 |
| C12                                                                                                  | 0.51043 | 0.47459 | 1.21265 | H67 | 0.49262 | 0.91261 | 1.78522 |
| C13                                                                                                  | 0.48974 | 0.48529 | 1.24478 | H68 | 0.44394 | 0.91473 | 1.8184  |
| C14                                                                                                  | 0.50029 | 0.5171  | 1.2351  | H69 | 0.45853 | 0.92304 | 1.59604 |
| C15                                                                                                  | 0.53185 | 0.53791 | 1.21053 | H70 | 0.45056 | 0.96352 | 1.86025 |
| C16                                                                                                  | 0.55298 | 0.52733 | 1.19393 | H71 | 0.45109 | 0.96468 | 1.62247 |
| C17                                                                                                  | 0.47824 | 0.52839 | 1.25191 | H72 | 0.50483 | 0.99604 | 1.88514 |
| O18                                                                                                  | 0.585   | 0.54812 | 1.19173 | H73 | 0.49484 | 1.0116  | 1.69836 |
| O19                                                                                                  | 0.45833 | 0.46482 | 1.27904 | H74 | 0.56356 | 1.02051 | 1.69349 |
| N20                                                                                                  | 0.48689 | 0.55718 | 1.22165 | H75 | 0.54195 | 1.0338  | 1.57096 |
| C21                                                                                                  | 0.36545 | 0.68564 | 1.22188 | H76 | 0.45838 | 1.06778 | 1.46957 |
| C22                                                                                                  | 0.6623  | 0.35908 | 0.633   | H77 | 0.42634 | 1.06682 | 1.3598  |
| C23                                                                                                  | 0.37249 | 0.63953 | 1.22049 | H78 | 0.4468  | 1.02622 | 1.67896 |
| C24                                                                                                  | 0.3663  | 0.61519 | 1.1039  | H79 | 0.44288 | 1.04728 | 1.85109 |
| C25                                                                                                  | 0.38509 | 0.60191 | 1.10309 | H80 | 0.41613 | 0.99492 | 1.94471 |
| C26                                                                                                  | 0.41036 | 0.61259 | 1.21963 | H81 | 0.39682 | 0.98097 | 1.73698 |
| C27                                                                                                  | 0.4166  | 0.63704 | 1.33582 | H82 | 0.38674 | 1.02206 | 2.004   |
| C28                                                                                                  | 0.39787 | 0.65043 | 1.33591 | H83 | 0.36113 | 0.98167 | 1.96698 |
| H29                                                                                                  | 0.6916  | 0.40558 | 0.87238 | H84 | 0.35699 | 1.02944 | 1.8     |
| H30                                                                                                  | 0.67862 | 0.44502 | 0.95384 | H85 | 0.3399  | 0.99082 | 1.71984 |
| H31                                                                                                  | 0.60806 | 0.41105 | 0.54882 | H86 | 0.37239 | 1.03381 | 1.49312 |
| H32                                                                                                  | 0.62154 | 0.3719  | 0.46475 | H87 | 0.37821 | 1.00157 | 1.51244 |
| H33                                                                                                  | 0.55583 | 0.46009 | 1.18766 | H88 | 0.4095  | 1.06976 | 1.82878 |
| H34                                                                                                  | 0.50189 | 0.45    | 1.20681 | H89 | 0.40866 | 1.08352 | 1.60961 |
| H35                                                                                                  | 0.54015 | 0.56246 | 1.20658 | H90 | 0.44462 | 1.09115 | 1.70715 |
| H36                                                                                                  | 0.45464 | 0.51211 | 1.28841 | C91 | 0.40196 | 0.83188 | 0.221   |
| C37                                                                                                  | 0.59653 | 0.57112 | 1.3287  | C92 | 0.43414 | 0.85057 | 0.20512 |
| C38                                                                                                  | 0.45097 | 0.44119 | 1.40961 | C93 | 0.44795 | 0.88269 | 0.20548 |
| H39                                                                                                  | 0.34713 | 0.60674 | 1.01173 | C94 | 0.42978 | 0.89679 | 0.22394 |
| H40                                                                                                  | 0.38005 | 0.5835  | 1.00974 | C95 | 0.39771 | 0.8782  | 0.23763 |
| H41                                                                                                  | 0.4356  | 0.64543 | 1.42901 | C96 | 0.38385 | 0.84603 | 0.23703 |

|     |         |         |         |      |         |         |          |
|-----|---------|---------|---------|------|---------|---------|----------|
| H42 | 0.40285 | 0.66894 | 1.42851 | H97  | 0.38342 | 0.88873 | 0.24893  |
| N43 | 0.51729 | 0.98612 | 1.6378  | H98  | 0.35895 | 0.83218 | 0.24626  |
| C44 | 0.52084 | 0.95965 | 1.68645 | C99  | 0.82033 | 1.36918 | -0.1722  |
| C45 | 0.4936  | 0.93524 | 1.7965  | C100 | 0.84533 | 1.37749 | -0.28799 |
| C46 | 0.46304 | 0.93204 | 1.73423 | C101 | 0.87551 | 1.39157 | -0.22182 |
| C47 | 0.46342 | 0.96302 | 1.74114 | C102 | 0.88113 | 1.3981  | -0.04033 |
| C48 | 0.49619 | 0.99128 | 1.74655 | C103 | 0.8561  | 1.38858 | 0.07661  |
| C49 | 0.5459  | 1.01395 | 1.58716 | C104 | 0.82596 | 1.37419 | 0.0112   |
| C50 | 0.43316 | 1.05282 | 1.44364 | H105 | 0.85994 | 1.393   | 0.21773  |
| N51 | 0.41577 | 1.0442  | 1.61614 | H106 | 0.80713 | 1.36829 | 0.10313  |
| C52 | 0.42938 | 1.03072 | 1.743   | H107 | 0.4487  | 0.84032 | 0.19354  |
| C53 | 0.40527 | 1.00048 | 1.83273 | H108 | 0.47267 | 0.89614 | 0.18814  |
| C54 | 0.3782  | 1.00361 | 1.90168 | H109 | 0.84149 | 1.37372 | -0.42968 |
| C55 | 0.36242 | 1.01163 | 1.7525  | H110 | 0.89467 | 1.39898 | -0.31294 |

---

**Table S2.** Fractional atomic coordinates for the unit cell of COF-Pip-2

| COF-Pip-2: Space group symmetry P3                                                                   |         |         |         |     |         |         |         |
|------------------------------------------------------------------------------------------------------|---------|---------|---------|-----|---------|---------|---------|
| $a = b = 35.9459 \text{ \AA}, c = 7.4393 \text{ \AA}, \alpha = \beta = 90^\circ, \gamma = 120^\circ$ |         |         |         |     |         |         |         |
| C1                                                                                                   | 0.34357 | 0.63366 | 1.44561 | C48 | 0.58546 | 0.85734 | 1.66538 |
| C2                                                                                                   | 0.62297 | 0.30257 | 1.04331 | C49 | 0.59961 | 0.9005  | 1.57012 |
| C3                                                                                                   | 0.60324 | 0.36007 | 1.04997 | C50 | 0.62982 | 0.9458  | 1.83374 |
| C4                                                                                                   | 0.56964 | 0.3419  | 1.17644 | C51 | 0.44987 | 1.03896 | 1.1263  |
| C5                                                                                                   | 0.54022 | 0.3564  | 1.18893 | N52 | 0.45507 | 1.07446 | 1.24984 |
| C6                                                                                                   | 0.54364 | 0.38896 | 1.07282 | C53 | 0.50155 | 1.10751 | 1.27697 |
| C7                                                                                                   | 0.57678 | 0.40656 | 0.94548 | C54 | 0.51992 | 1.10258 | 1.45718 |
| C8                                                                                                   | 0.60643 | 0.39239 | 0.93379 | C55 | 0.49576 | 1.10781 | 1.61724 |
| N9                                                                                                   | 0.51666 | 0.4076  | 1.09089 | C56 | 0.4477  | 1.08972 | 1.57869 |
| C10                                                                                                  | 0.47876 | 0.38921 | 1.16347 | C57 | 0.43161 | 1.05643 | 1.42484 |
| C11                                                                                                  | 0.45473 | 0.41241 | 1.18607 | C58 | 0.43424 | 1.09599 | 1.15569 |
| C12                                                                                                  | 0.4099  | 0.38772 | 1.2075  | H59 | 0.58913 | 0.27876 | 1.04512 |
| C13                                                                                                  | 0.38477 | 0.40721 | 1.23465 | H60 | 0.40954 | 0.6848  | 1.44288 |
| C14                                                                                                  | 0.40528 | 0.45214 | 1.24265 | H61 | 0.53659 | 0.53723 | 1.31952 |
| C15                                                                                                  | 0.44996 | 0.47687 | 1.22344 | H62 | 0.52623 | 0.54062 | 1.08476 |
| C16                                                                                                  | 0.47537 | 0.45783 | 1.19155 | H63 | 0.32898 | 0.32103 | 1.28188 |
| C17                                                                                                  | 0.38044 | 0.47405 | 1.27269 | H64 | 0.28391 | 0.32691 | 1.29997 |
| O18                                                                                                  | 0.52041 | 0.48253 | 1.16402 | H65 | 0.62868 | 0.98874 | 1.56517 |
| O19                                                                                                  | 0.33948 | 0.38362 | 1.24362 | H66 | 0.68315 | 1.0035  | 1.59553 |
| N20                                                                                                  | 0.39848 | 0.51069 | 1.35612 | H67 | 0.68482 | 0.9248  | 1.51459 |
| C21                                                                                                  | 0.37627 | 0.67686 | 1.44613 | H68 | 0.7033  | 0.95381 | 1.72071 |
| C22                                                                                                  | 0.6357  | 0.34633 | 1.04357 | H69 | 0.65913 | 0.887   | 1.89674 |
| C23                                                                                                  | 0.35452 | 0.59915 | 1.4341  | H70 | 0.68971 | 0.87829 | 1.73078 |
| C24                                                                                                  | 0.33291 | 0.56501 | 1.31177 | H71 | 0.61243 | 0.81804 | 1.75018 |
| C25                                                                                                  | 0.34585 | 0.53458 | 1.2888  | H72 | 0.62874 | 0.84104 | 1.52853 |
| C26                                                                                                  | 0.38057 | 0.5378  | 1.38897 | H73 | 0.57369 | 0.85695 | 1.80452 |
| C27                                                                                                  | 0.40131 | 0.57114 | 1.51401 | H74 | 0.55798 | 0.83139 | 1.58986 |
| C28                                                                                                  | 0.38837 | 0.60149 | 1.5373  | H75 | 0.57237 | 0.9069  | 1.57332 |
| H29                                                                                                  | 0.56705 | 0.31747 | 1.26958 | H76 | 0.60491 | 0.89527 | 1.42653 |
| H30                                                                                                  | 0.51596 | 0.34314 | 1.29324 | H77 | 0.65836 | 0.97404 | 1.89388 |
| H31                                                                                                  | 0.57965 | 0.43157 | 0.8561  | H78 | 0.62076 | 0.9187  | 1.92801 |
| H32                                                                                                  | 0.63185 | 0.40657 | 0.83412 | H79 | 0.60276 | 0.95252 | 1.83575 |
| H33                                                                                                  | 0.46345 | 0.35588 | 1.20457 | H80 | 0.41504 | 1.01533 | 1.109   |
| H34                                                                                                  | 0.3949  | 0.35327 | 1.19637 | H81 | 0.46203 | 1.05182 | 0.98884 |
| H35                                                                                                  | 0.46431 | 0.5113  | 1.23078 | H82 | 0.52153 | 1.10751 | 1.16304 |
| H36                                                                                                  | 0.34733 | 0.45895 | 1.22917 | H83 | 0.50674 | 1.1408  | 1.27718 |
| C37                                                                                                  | 0.54123 | 0.52827 | 1.18148 | H84 | 0.55456 | 1.12716 | 1.46622 |
| C38                                                                                                  | 0.31837 | 0.34302 | 1.3352  | H85 | 0.51753 | 1.07067 | 1.46506 |
| H39                                                                                                  | 0.30726 | 0.563   | 1.228   | H86 | 0.51051 | 1.14243 | 1.65177 |
| H40                                                                                                  | 0.32993 | 0.51005 | 1.18713 | H87 | 0.49975 | 1.09134 | 1.7363  |

|     |         |         |         |     |         |         |         |
|-----|---------|---------|---------|-----|---------|---------|---------|
| H41 | 0.4283  | 0.57414 | 1.59072 | H88 | 0.44188 | 1.1164  | 1.54375 |
| H42 | 0.40526 | 0.62724 | 1.63381 | H89 | 0.42892 | 1.07449 | 1.7034  |
| C43 | 0.65191 | 0.97723 | 1.5432  | H90 | 0.39635 | 1.04292 | 1.40846 |
| N44 | 0.63882 | 0.93707 | 1.6482  | H91 | 0.4351  | 1.02925 | 1.47385 |
| C45 | 0.67445 | 0.92746 | 1.65292 | H92 | 0.43466 | 1.12184 | 1.23974 |
| C46 | 0.66283 | 0.88486 | 1.74869 | H93 | 0.40004 | 1.07294 | 1.12232 |
| C47 | 0.62211 | 0.84746 | 1.66864 | H94 | 0.45105 | 1.11114 | 1.02678 |

---

**Table S3.** The Water Uptake, Area Swelling, and Ion Exchange Capacity of the COF-Pip membranes in this work are compared with recently reported anion exchange membranes, including hydrazone-linked COFs (abbreviated as COFs), cross-linked polymers, and block polymers.

| Membrane                       | Category     | Water uptake % | Area swelling % | IEC (mmol g <sup>-1</sup> ) | reference |
|--------------------------------|--------------|----------------|-----------------|-----------------------------|-----------|
| <b>COF-Pip-2</b>               | COFs         | 141.35         | 6.40            | 3.0                         | This work |
| <b>COF-Pip-B2</b>              | COFs         | 110.56         | 2.17            | 2.4                         |           |
| <b>COF-Pip-S2</b>              | COFs         | 153.21         | 7.11            | 4.0                         |           |
| <b>COF-QA-2</b>                | COFs         | 80             | 18              | 2.24                        | <b>1</b>  |
| <b>COF-SDQA</b>                | COFs         | 77.7           | 11.71           | 2.73                        | <b>2</b>  |
| <b>QA@COF-LZU1/PPO-5</b>       | COFs         | 45.6           | 12.6            | 2.91                        | <b>3</b>  |
| <b>Im@PI-2/PPO-5.0</b>         | COFs         | 45.6           | 14.7            | 2.76                        | <b>4</b>  |
| <b>IL-COF/GPPO-5</b>           | COFs         | 45.37          | 17              | 2.88                        | <b>5</b>  |
| <b>TJU-1</b>                   | COFs         | 18.1           | 6.7             | 2.99                        | <b>6</b>  |
| <b>COF-3OH</b>                 | COFs         | 125.3          | 5.0             | 2.05                        | <b>7</b>  |
| <b>COF-QA-TFB(P)</b>           | COFs         | 83             | 16              | 2.38                        | <b>8</b>  |
| <b>OHPTP-10TBB</b>             | cross-linked | 63.1 ± 4.4     | 30.1 ± 5.2      | 1.97                        | <b>9</b>  |
| <b>x-PDB-0-F5-SEBS</b>         | cross-linked | 111.1 ± 2.4    | 32.3 ± 1.9      | 1.86                        | <b>10</b> |
| <b>QPBP-PX-15%</b>             | cross-linked | 40.3           | 9.7             | 2.81                        | <b>11</b> |
| <b>CQP(Vpip-St-AN)2-QPDTP1</b> | cross-linked | 73.4           | 19.04           | 1.49                        | <b>12</b> |
| <b>PFTP-13</b>                 | block        | 45             | 16              | 2.81                        | <b>13</b> |
| <b>b-N5-QPTP</b>               | block        | 97.53          | 26.67           | 2.65                        | <b>14</b> |
| <b>qPTOCB-10</b>               | block        | 76             | 29              | 2.87                        | <b>15</b> |
| <b>pQP50-mTP</b>               | block        | 85             | 88              | 2.41                        | <b>16</b> |

**Table S4.** The OH<sup>-</sup> Conductivity, and Ion Exchange Capacity of the COF-Pip-2 in this work are compared with recently reported anion exchange membranes, including hydrazone-linked COFs (abbreviated as COFs), cross-linked polymers, and block polymers.

| Membrane                       | Category     | OH <sup>-</sup> Conductivity | IEC (mmol g <sup>-1</sup> ) | reference        |
|--------------------------------|--------------|------------------------------|-----------------------------|------------------|
| <b>COF-Pip-2</b>               | COFs         | 207.1                        | 3.0                         | <b>This work</b> |
| <b>COF-QA-2</b>                | COFs         | 212                          | 2.24                        | <b>1</b>         |
| <b>COF-SDQA</b>                | COFs         | 329.4                        | 2.73                        | <b>2</b>         |
| <b>QA@COF-LZU1/PPO-5</b>       | COFs         | 168                          | 2.91                        | <b>3</b>         |
| <b>Im@PI-2/PPO-5.0</b>         | COFs         | 147                          | 2.76                        | <b>4</b>         |
| <b>IL-COF/GPPO-5</b>           | COFs         | 89.93                        | 2.88                        | <b>5</b>         |
| <b>TJU-1</b>                   | COFs         | 187                          | 2.99                        | <b>6</b>         |
| <b>COF-3OH</b>                 | COFs         | 263.14                       | 2.05                        | <b>7</b>         |
| <b>COF-QA-TFB(P)</b>           | COFs         | 200                          | 2.38                        | <b>8</b>         |
| <b>OHPTP-10TBB</b>             | cross-linked | 136                          | 1.97                        | <b>9</b>         |
| <b>x-PDB-0-F5-SEBS</b>         | cross-linked | 135.11                       | 1.86                        | <b>10</b>        |
| <b>QPBP-PX-15%</b>             | cross-linked | 163                          | 2.81                        | <b>11</b>        |
| <b>CQP(Vpip-St-AN)2-QPDTP1</b> | cross-linked | 148                          | 1.49                        | <b>12</b>        |
| <b>PFTP-13</b>                 | block        | 208                          | 2.81                        | <b>13</b>        |
| <b>b-N5-QPTP</b>               | block        | 157.68                       | 2.65                        | <b>14</b>        |
| <b>qPTOCB-10</b>               | block        | 155                          | 2.87                        | <b>15</b>        |
| <b>pQP50-mTP</b>               | block        | 197                          | 2.41                        | <b>16</b>        |

## Reference

- [1] X. He, Y. Yang, H. Wu, G. He, Z. Xu, Y. Kong, L. Cao, B. Shi, Z. Zhang, C. Tongsh, K. Jiao, K. Zhu and Z. Jiang, *Adv. Mater.*, **2020**, 32, 2001284.
- [2] Y. Kong, B. Lyu, C. Fan, Y. Yang, X. Wang, B. Shi, J. Jiang, H. Wu and Z. Jiang, *J. Am. Chem. Soc.*, **2023**, 145, 27984-27992.
- [3] J. Chen, M. Guan, K. Li and S. Tang, *ACS Appl. Mater. Interfaces*, **2020**, 12, 15138-15144.
- [4] J. Chen, P. Li, N. Zhang and S. Tang, *Electrochim. Acta*, **2021**, 391, 138962.
- [5] N. Zhang, P. Li, X. Li and S. Tang, *Int. J. Hydrogen Energy*, **2022**, 47, 29481-29494.
- [6] J. Chen, P. Li, N. Zhang and S. Tang, *J. Mater. Chem. A*, **2022**, 10, 7146-7154.
- [7] G. Wang, B. Wang, L. Zhang and S. Zhang, *Small*, **2025**, 21, 2406847.
- [8] Y. Kong, X. He, H. Wu, Y. Yang, L. Cao, R. Li, B. Shi, G. He, Y. Liu, Q. Peng, C. Fan, Z. Zhang, Z. Jiang, *Angew. Chem. Int. Ed.* **2021**, 60, 17638.
- [9] X. Su, S. Nan, W. Wei, S. Xu and R. He, *J. Membr. Sci.*, **2023**, 683, 121843.
- [10] S. Jeon, S. Han, J. Lee, K. Min, S. Y. Nam and T.-H. Kim, *J. Mater. Chem. A*, **2024**, 12, 18593-18603.
- [11] Z. Zheng, B. Xue, J. Yao, Q. He, Z. Wang and J. Yan, *Mater. Horiz.*, **2024**, 11, 6117-6125.
- [12] Y. Li, K. Huang, F. Xu, Y. Han, Q. Yang and B. Lin, *ACS Appl. Polym. Mater.*, **2025**, 7, 2053-2060.
- [13] N. Chen, H. H. Wang, S. P. Kim and et al., *Nat. Commun.*, **2021**, 12, 2367.
- [14] S. Jeon, H. W. Kang, K. Min, W. Lee, H. Maeng, C. H. Park and T.-H. Kim, *J. Membr. Sci.*, **2025**, 726, 124050.
- [15] J. H. Kim, G. H. Sim, H. J. Roh, J. H. Lee and J. H. Kim, *J. Membr. Sci.*, **2026**, 738, 124785.
- [16] K. Mazumder, H. Nederstedt, R. Weber, S. Haraguchi, R. Neubert, F. A. Plamper, C. Müller and M. Sommer, *ACS Appl. Mater. Interfaces*, **2025**, 17, 41978-41990.
